# Supplementary material for: ‘Unwilling’ versus ‘unable’: Tonkean macaques’ understanding of human goal-directed actions
Source: PeerJ journal article supplement (doi:10.7717/peerj.3227), 2017-05-03
Supplement: raw_data_Canteloup&Meunier.xls [file raw_data_Canteloup%26Meunier.xls]

## Sheet: Results
condition	session	subject	begging	item grasping attempt	gaze elsewhere	gaze alternation	threat	yawn and scratch itself	present	duration trial
Distracted	1	Gaetan	6	5.37	7.88	4	0	0	30.51	30.51
Distracted	1	Nenno	11	8.67	1.42	4	0	0	27.06	27.06
Distracted	1	Nereis	14	1.15	4.25	7	0	0	26.55	26.55
Distracted	1	Olli	3	0	7.69	11	0	0	25.26	29.33
Distracted	1	Shan	2	0	14.27	0	0	4.36	27.34	27.34
Distracted	1	Ulrich	2	3.34	4.78	4	0	0	30.2	30.2
Distracted	1	Ulysse	0	5.13	11.55	6	0.44	0	31.87	31.87
Distracted	1	Uruk	4	1.88	8.75	8	0	0	29.56	29.56
Distracted	1	Vishnu	1	1.69	6.09	1	0	0.76	30.94	30.94
Distracted	1	Wallace	0	0	2.97	8	0	0	30.35	30.35
Distracted	1	Walt	6	0.92	10.28	3	0	0	31.32	31.32
Distracted	1	Wotan	11	0	8.1	1	0	1.37	27.56	27.56
Distracted	1	Yang	5	2.18	13.13	5	0	0	32.03	32.03
Distracted	1	Yannick	6	0	15.46	9	0	0	28.92	29.44
Distracted	1	Yin	0	0	17.9	4	0	0	10	26.37
Distracted	2	Gaetan	5	6.02	2.94	5	0	0	28.53	28.53
Distracted	2	Nenno	10	1.24	3.55	1	0	0.93	25.01	25.01
Distracted	2	Nereis	12	0.96	5.08	2	0	0	27.08	27.08
Distracted	2	Olli	6	0	4.24	8	0	0	27.59	27.59
Distracted	2	Shan	7	1.62	17.5	1	0	0	28.34	28.34
Distracted	2	Ulrich	7	4.45	14.31	5	0	0	26.86	26.86
Distracted	2	Ulysse	0	1.85	11.61	4	0	0	30.41	30.41
Distracted	2	Uruk	11	29.9	11.74	1	0	1.18	29.9	29.9
Distracted	2	Vishnu	5	3.3	9.87	3	0	2.17	29.18	29.18
Distracted	2	Wallace	7	0	9.47	18	0	16.3	32.91	32.91
Distracted	2	Walt	8	0	14.3	2	0	0	27.92	27.92
Distracted	2	Wotan	4	0	13.07	3	0	2.75	30.42	30.42
Distracted	2	Yang	3	0	11.65	9	0	1.39	29.09	29.09
Distracted	2	Yannick	5	1.2	14.36	1	0	1.09	28.38	28.38
Distracted	2	Yin	0	0	22.5	0	0	0	3.54	24.88
Distracted	3	Gaetan	8	1.57	8.41	7	0	0	29.01	29.01
Distracted	3	Nenno	7	7.3	0.88	10	0	0	29.62	29.62
Distracted	3	Nereis	2	0.95	8.77	3	0	0	24.73	24.73
Distracted	3	Olli	5	0	15.31	11	0	0	30.05	30.05
Distracted	3	Shan	7	0	15.42	2	0	3.58	28.88	28.88
Distracted	3	Ulrich	14	0	12.75	2	0	0	28.28	28.28
Distracted	3	Ulysse	0	0	16.63	3	0	3.2	29.18	29.18
Distracted	3	Uruk	4	0.56	18.58	9	0	2.97	27.26	27.26
Distracted	3	Vishnu	9	0	14.83	5	0	0	28.95	28.95
Distracted	3	Wallace	7	0	2.06	9	0	0	29.83	29.83
Distracted	3	Walt	6	0	15.58	2	0	0	25.57	25.57
Distracted	3	Wotan	3	0	13.62	3	0	0.63	29.25	29.25
Distracted	3	Yang	8	0	6.17	7	0	1.31	29.66	29.66
Distracted	3	Yannick	1	0	19.31	4	0	2.88	29.99	29.99
Distracted	3	Yin	0	0	18.61	8	0	0	23.46	29.14
Distracted	4	Gaetan	4	8.79	7.07	0	0	0	29.73	29.73
Distracted	4	Nenno	8	8.12	2.09	14	0	0	25.3	25.3
Distracted	4	Nereis	3	0	16.01	8	0	0	28.59	28.59
Distracted	4	Olli	5	0	6.35	5	0	0.12	23.98	23.98
Distracted	4	Shan	3	0.86	17.43	0	0	7.99	28.68	28.68
Distracted	4	Ulrich	7	0.77	17.09	2	0	0	27.06	27.06
Distracted	4	Ulysse	2	0	19.76	0	0	0	29.01	29.01
Distracted	4	Uruk	3	0	16.94	6	0	5.08	27.98	27.98
Distracted	4	Vishnu	11	0.4	10.11	1	0	0	28.83	28.83
Distracted	4	Wallace	0	0	25.12	7	0	2.25	12.61	30.16
Distracted	4	Walt	4	0	10.34	0	0	1.12	24.01	24.01
Distracted	4	Wotan	7	0	12.93	1	0	0	26.9	26.9
Distracted	4	Yang	3	0	22.23	1	0	0	31.74	31.74
Distracted	4	Yannick	7	3.75	9.11	2	0	1.04	29.74	29.74
Distracted	4	Yin	0	0	21.3	1	0	0	28.45	28.45
Distracted	5	Gaetan	2	0	11.78	9	0	7.9	26.31	26.31
Distracted	5	Nenno	4	4.14	6.15	4	0	0	19.25	19.25
Distracted	5	Nereis	2	0.52	16.13	6	0	0	26.32	26.32
Distracted	5	Olli	3	0	2.2	16	0	0	24.81	24.81
Distracted	5	Shan	0	0	26.69	0	0	6.38	29.15	29.15
Distracted	5	Ulrich	1	0	21.92	1	0	0	26.71	26.71
Distracted	5	Ulysse	0	0	17.13	3	0	0	26.67	26.67
Distracted	5	Uruk	0	0	21.14	2	0	0	26.5	26.5
Distracted	5	Vishnu	3	0	14.97	0	0	3.53	28.74	28.74
Distracted	5	Wallace	8	0	27.68	0	0	9.22	27.68	27.68
Distracted	5	Walt	4	0	9.92	2	0	0	23.35	23.35
Distracted	5	Wotan	6	0	10.08	0	0	1.25	24.97	24.97
Distracted	5	Yang	0	0	22.07	0	0	5.74	16.08	26.43
Distracted	5	Yannick	3	8.74	13.68	7	0	0	21.94	30.47
Distracted	5	Yin	0	0	25.83	4	0	0	10.73	29.73
Distracted	6	Gaetan	4	2.47	9.62	11	0	0	28.8	28.8
Distracted	6	Nenno	5	10.48	1.85	4	0	0	25.28	25.28
Distracted	6	Nereis	2	0	8.45	7	0	0	23.9	23.9
Distracted	6	Olli	3	0	4.03	9	0	0	24.83	24.83
Distracted	6	Shan	3	1.21	15.92	0	0	5.86	28.44	28.44
Distracted	6	Ulrich	1	0	14.39	1	0	0	23.28	23.28
Distracted	6	Ulysse	0	0	16.78	3	0	2.73	24.98	24.98
Distracted	6	Uruk	0	0	17.73	2	0	4.13	24.16	24.16
Distracted	6	Vishnu	11	0	10.52	1	0	0	27.88	27.88
Distracted	6	Wallace	3	1.53	18.27	2	0	10.85	28.67	28.67
Distracted	6	Walt	1	0	17.75	0	0	0	24.23	24.23
Distracted	6	Wotan	2	0	10.76	3	0	4.26	26.06	26.06
Distracted	6	Yang	10	0	8.6	2	0	0	23.76	23.76
Distracted	6	Yannick	1	1.85	21.69	6	0	0	15.69	28.74
Distracted	6	Yin	1	0	10.67	4	0	0	23.32	23.32
Unable	1	Gaetan	2	4.32	10.74	2	0	2.45	29.6	29.6
Unable	1	Nenno	5	16.03	3.42	3	0	0	25.21	25.21
Unable	1	Nereis	1	0.75	12.46	8	0	0	24.72	24.72
Unable	1	Olli	3	1.99	4.87	10	0	0	27.95	27.95
Unable	1	Shan	3	0	13.23	8	0	0	30.62	30.62
Unable	1	Ulrich	3	5.27	11.73	9	0	0	29.8	29.8
Unable	1	Ulysse	0	4.59	12.24	3	0	0	32.04	32.04
Unable	1	Uruk	3	13.87	9.52	5	0	0.82	29.02	29.02
Unable	1	Vishnu	6	10.28	5.08	10	0	0	30.1	30.1
Unable	1	Wallace	3	0	4.72	6	0	0	29.85	29.85
Unable	1	Walt	10	1.86	13.57	3	0	0	31.43	31.43
Unable	1	Wotan	5	0	10.65	8	0	2.63	28.08	28.08
Unable	1	Yang	7	5.76	9.94	14	0	0	33.62	33.62
Unable	1	Yannick	0	0.26	15.58	4	0	0	32.95	32.95
Unable	1	Yin	0	0.58	2.31	14	0	2.73	25.16	25.16
Unable	2	Gaetan	1	9.28	11.49	10	0	0	26.68	26.68
Unable	2	Nenno	11	5.89	10.32	0	0	0	27.37	27.37
Unable	2	Nereis	1	0.58	10.61	11	0	0	25.41	25.41
Unable	2	Olli	7	2.24	7.65	10	0	0	25.15	25.15
Unable	2	Shan	6	0.84	17.48	6	0	0	30.68	30.68
Unable	2	Ulrich	6	6.4	10.59	5	0	0	24.68	24.68
Unable	2	Ulysse	0	0.62	20.79	3	0	0	29.98	29.98
Unable	2	Uruk	2	5.05	14.03	7	0	0	27.44	27.44
Unable	2	Vishnu	9	1.1	14.72	1	0	0	28.96	28.96
Unable	2	Wallace	1	0	19.01	6	0	7.56	31.46	31.46
Unable	2	Walt	4	2.45	14.5	2	0	0	25.83	25.83
Unable	2	Wotan	6	0	16.36	2	0	1.62	27.5	27.5
Unable	2	Yang	6	2.1	15.07	3	0	0	27.45	27.45
Unable	2	Yannick	2	2.28	18.34	7	0	0	27.8	27.8
Unable	2	Yin	0	1.99	20.52	2	0	0	4.78	23.95
Unable	3	Gaetan	0	8.83	7.49	2	0	4.09	26.39	26.39
Unable	3	Nenno	3	3.92	4.34	6	0	0	24.76	24.76
Unable	3	Nereis	2	0.64	15.08	7	0	0	28.36	28.36
Unable	3	Olli	3	4.05	7.85	6	0	0	22.78	22.78
Unable	3	Shan	2	1.33	18.18	1	0	0	28.73	28.73
Unable	3	Ulrich	3	10.55	8.58	3	0	0	24.43	24.43
Unable	3	Ulysse	1	1.16	14.42	2	0	1.41	25.56	25.56
Unable	3	Uruk	3	21.86	6.54	7	0	0	25.18	25.18
Unable	3	Vishnu	3	1.47	15.7	4	0	2.11	27.29	27.29
Unable	3	Wallace	2	0	14.07	19	0	7.23	26.97	26.97
Unable	3	Walt	4	1.5	15.79	2	0	0	24.03	24.03
Unable	3	Wotan	0	1.55	20.77	0	0	1.22	26.18	26.18
Unable	3	Yang	3	3.1	13.35	2	0	0	24.92	24.92
Unable	3	Yannick	2	4.66	12.54	4	0	1.68	28.07	28.07
Unable	3	Yin	0	1.41	21.12	2	0	0	3.05	23.07
Unable	4	Gaetan	1	2.96	12.47	3	0	0	28.04	28.04
Unable	4	Nenno	4	1.97	4.21	3	0	0	23.32	23.32
Unable	4	Nereis	0	2.12	13.47	7	0	0	26.02	26.02
Unable	4	Olli	4	0	7.83	10	0	0	23.46	23.46
Unable	4	Shan	1	2.85	13.22	2	0	0	25.44	25.44
Unable	4	Ulrich	3	3.8	11.01	3	0	0	25.32	25.32
Unable	4	Ulysse	0	27.33	20.27	1	0	0	17.5	28.17
Unable	4	Uruk	3	1.85	13.4	6	0	0	23.28	23.28
Unable	4	Vishnu	2	1.4	17.51	3	0	0	24.92	24.92
Unable	4	Wallace	0	3.72	12.18	6	0	8.86	30.28	30.28
Unable	4	Walt	0	1.85	11.91	6	0	0	20.66	20.66
Unable	4	Wotan	4	0.86	13.87	6	0	0	26.65	26.65
Unable	4	Yang	1	1.86	15.71	4	0	0	23.05	25.21
Unable	4	Yannick	2	17.26	4.98	4	0	0	27.62	27.62
Unable	4	Yin	0	3.61	11.01	4	0	0	23.44	23.44
Unable	5	Gaetan	2	1.72	12.2	3	0	0	25.23	25.23
Unable	5	Nenno	0	6.14	5.09	0	0	0	22.97	22.97
Unable	5	Nereis	4	1	12.29	3	0	0	22.56	22.56
Unable	5	Olli	3	0	4.19	15	0	0	22.22	22.22
Unable	5	Shan	1	2.86	10.22	1	0	0	26.68	26.68
Unable	5	Ulrich	4	2.96	7.4	6	0	0	23.08	23.08
Unable	5	Ulysse	0	1.79	21.31	0	0	1.37	24.5	24.5
Unable	5	Uruk	2	1.74	18.21	5	0	0	24.24	24.24
Unable	5	Vishnu	1	1.69	18.83	3	0	0	26.95	26.95
Unable	5	Wallace	2	2.29	12.73	9	0	7.89	28.79	28.79
Unable	5	Walt	4	6.46	11.11	2	0	0	22.87	22.87
Unable	5	Wotan	1	2.72	11.09	9	0	2.23	22.94	22.94
Unable	5	Yang	1	0	13.01	7	2.44	2.19	29.5	29.5
Unable	5	Yannick	3	4.63	7.32	4	0	0	26.41	26.41
Unable	5	Yin	0	0.84	18.7	3	0	0	25.25	25.25
Unable	6	Gaetan	1	4.8	9.42	6	0	0	24.42	24.42
Unable	6	Nenno	0	5.54	6.57	3	0	0	24.13	24.13
Unable	6	Nereis	0	1.17	13.02	4	0	0	22.97	22.97
Unable	6	Olli	0	0	2.1	12	0	0	25.94	25.94
Unable	6	Shan	6	6.01	3.61	4	0	0	26.61	26.61
Unable	6	Ulrich	1	4.77	12.65	3	0	0	21.56	21.56
Unable	6	Ulysse	2	2	14.34	1	0	2.92	21.94	21.94
Unable	6	Uruk	0	1.13	41.68	1	0	0	10.65	44.74
Unable	6	Vishnu	6	4.23	14.05	5	0	0	27.47	27.47
Unable	6	Wallace	0	4.45	8.15	10	0	8.44	28.43	28.43
Unable	6	Walt	0	1.16	15.01	2	0	0	25.01	25.01
Unable	6	Wotan	0	2.34	9.17	8	0	0	23.49	23.49
Unable	6	Yang	5	6.08	8.45	2	0	0	24.54	24.54
Unable	6	Yannick	1	2.23	23.84	1	0	0	6.09	27.4
Unable	6	Yin	0	0.79	14.1	8	0	0	23.9	23.9
Unwilling	1	Gaetan	0	7.72	7.1	7	0	0	31.66	31.66
Unwilling	1	Nenno	5	20.6	1.67	2	0	0	27.06	27.06
Unwilling	1	Nereis	2	8.86	4.34	20	0	0	28.9	28.9
Unwilling	1	Olli	0	11.66	9.2	5	0	0	21.01	28.5
Unwilling	1	Shan	4	18.14	3.47	0	0	0	28.62	28.62
Unwilling	1	Ulrich	2	9.95	12.32	6	0	0	31.27	31.27
Unwilling	1	Ulysse	0	16.31	5.96	10	2	0	30.96	30.96
Unwilling	1	Uruk	0	11.81	11.67	4	1	0	20.4	27.17
Unwilling	1	Vishnu	1	21.23	5.9	1	0	0	30.7	30.7
Unwilling	1	Wallace	0	0	0.77	6	0	0	30	30
Unwilling	1	Walt	5	22.12	3.95	2	0	0	32.11	32.11
Unwilling	1	Wotan	9	0.23	6.55	8	0	0	30.67	30.67
Unwilling	1	Yang	7	13.1	2.71	4	0	0	29.58	29.58
Unwilling	1	Yannick	1	9.2	25.98	7	0	0	27.94	44.81
Unwilling	1	Yin	0	4.87	16.01	6	0	0	12.36	27.44
Unwilling	2	Gaetan	0	22.47	4.47	6	0	0	32.05	32.05
Unwilling	2	Nenno	4	17.24	2.94	0	0	0	26.34	26.34
Unwilling	2	Nereis	0	4.87	12.31	3	0	0	27.73	27.73
Unwilling	2	Olli	3	5.64	3.02	11	0	0	25.84	25.84
Unwilling	2	Shan	2	4.09	14.04	1	0	0	31.27	31.27
Unwilling	2	Ulrich	2	13.15	4.07	2	0	0	23.94	23.94
Unwilling	2	Ulysse	0	3.79	10.33	7	0	0	29.19	29.19
Unwilling	2	Uruk	5	12.91	0	0	0	0	30.66	30.66
Unwilling	2	Vishnu	2	15.65	9.92	2	0	0	32.25	32.25
Unwilling	2	Wallace	2	1.89	7.11	5	0	3.87	33.97	33.97
Unwilling	2	Walt	1	18.8	4.5	4	0	0	28.46	28.46
Unwilling	2	Wotan	9	9.27	10.26	5	0	0.91	34.37	34.37
Unwilling	2	Yang	4	13.9	5.7	8	0	0	27.05	27.05
Unwilling	2	Yannick	1	22.13	0.44	2	0	0	27.45	27.45
Unwilling	2	Yin	0	6.16	11.61	15	0	0	9.76	27.07
Unwilling	3	Gaetan	3	15.68	4.07	7	0	0	28.41	28.41
Unwilling	3	Nenno	2	13.34	1.64	6	0	0	26.02	26.02
Unwilling	3	Nereis	0	4.88	8.99	12	0	0	25.54	25.54
Unwilling	3	Olli	5	4.23	8.51	19	0	0	23.54	28.01
Unwilling	3	Shan	1	4.86	15.39	4	0	0	30.28	30.28
Unwilling	3	Ulrich	6	7.08	13.23	2	0	0	27.9	27.9
Unwilling	3	Ulysse	0	3.03	26.24	0	0	0	30.89	30.89
Unwilling	3	Uruk	2	4.18	17.82	4	0	0	27.96	27.96
Unwilling	3	Vishnu	5	4.85	16.97	6	1	0	31.09	31.09
Unwilling	3	Wallace	1	3.9	4.96	17	0	3.12	29.9	29.9
Unwilling	3	Walt	2	17.53	4.51	6	0	0	27.81	27.81
Unwilling	3	Wotan	0	4.9	16.74	2	0	1.56	30.38	30.38
Unwilling	3	Yang	2	11.97	5.83	8	1	0	26.7	26.7
Unwilling	3	Yannick	0	17.85	2.75	12	0	0	29.48	29.48
Unwilling	3	Yin	0	3.84	13.39	11	0	0	25.43	28.11
Unwilling	4	Gaetan	0	4.04	19.43	6	0	5.86	29.13	29.13
Unwilling	4	Nenno	4	8.32	4.07	8	0	0	23.69	23.69
Unwilling	4	Nereis	0	5.66	5.59	13	0	0	28.53	28.53
Unwilling	4	Olli	2	9.22	1.17	13	0	0	26.93	26.93
Unwilling	4	Shan	2	4.66	9.9	2	0	8.8	28.51	28.51
Unwilling	4	Ulrich	0	16.37	7.41	2	0	0	28.87	28.87
Unwilling	4	Ulysse	0	4.23	16.86	5	2.2	0	18.57	28.06
Unwilling	4	Uruk	0	6.87	12.45	9	0	0	26.08	26.08
Unwilling	4	Vishnu	1	1	24.98	0	0	6.37	31.22	31.22
Unwilling	4	Wallace	0	16.58	0.6	12	0	1.12	28.1	28.1
Unwilling	4	Walt	1	10.97	5.38	1	0	0	22.97	22.97
Unwilling	4	Wotan	0	4.37	11.07	2	0	5.44	27.33	27.33
Unwilling	4	Yang	2	11.29	3.7	7	0	0	26.14	26.14
Unwilling	4	Yannick	0	20.4	0.21	19	0	0	27	27
Unwilling	4	Yin	0	2.82	16.93	7	0	0	27.4	27.4
Unwilling	5	Gaetan	0	14.4	7.29	4	0	0	26.97	26.97
Unwilling	5	Nenno	1	11.76	3.04	4	0	0	24.44	24.44
Unwilling	5	Nereis	0	1.94	19	3	0	0	25.84	25.84
Unwilling	5	Olli	0	5.43	1.5	9	0	0	24.47	24.47
Unwilling	5	Shan	0	3.24	11.07	2	0	4.09	29	29
Unwilling	5	Ulrich	7	12.7	8.32	3	0	0	25.8	25.8
Unwilling	5	Ulysse	0	2.56	19.88	5	2	0.73	17.66	26.02
Unwilling	5	Uruk	2	4.96	17.31	2	0	3.79	23.45	26.15
Unwilling	5	Vishnu	0	21.9	3.65	6	0	0	31.53	31.53
Unwilling	5	Wallace	0	19.78	2.58	6	0	1.16	30.93	30.93
Unwilling	5	Walt	2	13.65	8.78	2	0	0	25.47	25.47
Unwilling	5	Wotan	1	8.82	7.85	5	0	3.04	26.8	26.8
Unwilling	5	Yang	1	11.63	7.79	7	1	0.56	31.66	31.66
Unwilling	5	Yannick	1	10.63	16.49	10	0	0	15.62	29.54
Unwilling	5	Yin	0	0.97	17.78	5	0	0	27.2	27.2
Unwilling	6	Gaetan	1	13.46	5.36	3	0	0	28.75	28.75
Unwilling	6	Nenno	5	8.35	3.1	4	0	0	22.67	22.67
Unwilling	6	Nereis	1	6.25	7.61	9	0	0	27.09	27.09
Unwilling	6	Olli	0	9.59	1.1	10	0	0	24.69	24.69
Unwilling	6	Shan	1	14.72	4.36	2	0	0	28.19	28.19
Unwilling	6	Ulrich	0	12.4	8.13	2	0	0	24.68	24.68
Unwilling	6	Ulysse	0	1.61	24.17	2	1	3.98	27.56	27.56
Unwilling	6	Uruk	1	2.48	14.57	9	1	2.68	24.71	24.71
Unwilling	6	Vishnu	2	15.17	4.32	6	0	0	29.74	29.74
Unwilling	6	Wallace	2	4.61	20.43	5	0	3.4	30.56	30.56
Unwilling	6	Walt	0	3.69	16.96	0	0	0	24.2	24.2
Unwilling	6	Wotan	0	3.91	16.37	0	0	0	26.46	26.46
Unwilling	6	Yang	0	15.94	2.77	0	0	0	23.99	23.99
Unwilling	6	Yannick	1	12.5	12.94	10	0	0	21.83	28.17
Unwilling	6	Yin	0	11.91	6.44	16	0	0	22.88	22.88
